# Supplementary material for: Protein changes as robust signatures of fish chronic stress: a proteomics approach to fish welfare research
Source: PubMed Central journal article supplement (PMC7168993; doi:10.1186/s12864-020-6728-4), 2020-04-19
Supplement: 12864_2020_6728_MOESM1_ESM.pdf [file 12864_2020_6728_MOESM1_ESM.pdf]

**Additional file 1.** Growth performance of gilthead seabream (*Sparus aurata*) submitted to three different chronic stressors. Values are mean  $\pm$  SD (n = 75).

| Trials/Treatments | IBW (g) <sup>1</sup> | FBW (g) <sup>2</sup> | SGR (% d <sup>-1</sup> ) <sup>3</sup> |
|-------------------|----------------------|----------------------|---------------------------------------|
| CTRL              | 368.63 $\pm$ 13.71   | 372.02 $\pm$ 48.79   | 0.02                                  |
| OC30              | 371.27 $\pm$ 4.75    | 372.58 $\pm$ 61.45   | 0.01                                  |
| OC45              | 379.15 $\pm$ 8.37    | 379.16 $\pm$ 71.20   | 0.00                                  |
| CTRL              | 376.56 $\pm$ 12.05   | 345.93 $\pm$ 47.53   | -0.16                                 |
| NET2              | 374.53 $\pm$ 27.09   | 348.52 $\pm$ 66.42   | -0.13                                 |
| NET4              | 376.47 $\pm$ 5.86    | 344.04 $\pm$ 44.62   | -0.17                                 |
| CTRL              | 417.79 $\pm$ 22.73   | 384.71 $\pm$ 86.58   | -0.15                                 |
| HYP30             | 389.81 $\pm$ 5.73    | 375.40 $\pm$ 55.08   | -0.07                                 |
| HYP15             | 393.69 $\pm$ 47.54   | 379.16 $\pm$ 71.20   | -0.07                                 |

<sup>1</sup>IBW - Initial body weight

<sup>2</sup>FBW - Final body weight

<sup>3</sup>SGR - Specific growth rate

<sup>4</sup>HSI - Hepatosomatic index
