# Supplementary material for: Protein changes as robust signatures of fish chronic stress: a proteomics approach to fish welfare research
Source: PubMed Central journal article supplement (PMC7168993; doi:10.1186/s12864-020-6728-4), 2020-04-19
Supplement: 12864_2020_6728_MOESM2_ESM.pdf [file 12864_2020_6728_MOESM2_ESM.pdf]

**Additional file 2.** Protein spots, with statistically different relative abundances ( $P < 0.05$ ), identified in gilthead seabream (*Sparus aurata*) blood plasma proteome from NET and HYP trials, by MALDI-TOF/TOF MS after separation by 2D-DIGE. List is given in ascending order of spot number.

| Spot no <sup>a</sup>                                   | Accession no. <sup>b</sup> | Protein ID <sup>c</sup>                                                                     | Protein Score <sup>d</sup> | Total Ion Score <sup>e</sup> | Mw (kDa) <sup>f</sup> |        | pI <sup>g</sup> |     | PC <sup>h</sup> | p-value <sup>i</sup> | q-value <sup>j</sup> |                 | FC <sup>k</sup> |              |
|--------------------------------------------------------|----------------------------|---------------------------------------------------------------------------------------------|----------------------------|------------------------------|-----------------------|--------|-----------------|-----|-----------------|----------------------|----------------------|-----------------|-----------------|--------------|
|                                                        |                            |                                                                                             |                            |                              | T                     | O      | T               | O   |                 |                      | T1                   | T2              | T1              | T2           |
| Differential protein spots identified in the NET trial |                            |                                                                                             |                            |                              |                       |        |                 |     |                 |                      |                      |                 |                 |              |
| 52                                                     | AEA41139.1                 | transferrin [ <i>Sparus aurata</i> ]                                                        | 212                        | 181                          | 74.28                 | 113.97 | 5.93            | 5.9 | 12              | 1.40E-02             | 6.76E-01             | <b>1.35E-02</b> | 0.32            | 0.85         |
| 144                                                    | AKA66306.1                 | complement factor B-like protein, partial [ <i>Siniperca chuatsi</i> ]                      | 308                        | 274                          | 77.13                 | 95.81  | 5.57            | 5   | 5               | 1.11E-02             | 1.83E-01             | <b>8.34E-03</b> | <b>1.06</b>     | <b>1.78</b>  |
| 146                                                    | XP_008277007.1             | PREDICTED: complement factor B-like [ <i>Stegastes partitus</i> ]                           | 327                        | 306                          | 84.98                 | 93.56  | 5.61            | 5   | 10              | 3.84E-03             | 9.72E-02             | <b>2.81E-03</b> | <b>1.59</b>     | <b>2.38</b>  |
| 152                                                    | XP_008277007.1             | PREDICTED: complement factor B-like [ <i>Stegastes partitus</i> ]                           | 331                        | 317                          | 84.98                 | 93.56  | 5.61            | 5   | 8               | 3.49E-04             | <b>2.88E-02</b>      | <b>2.39E-04</b> | <b>1.72</b>     | <b>2.54</b>  |
| 202                                                    | XP_019111370.1             | PREDICTED: inter-alpha-trypsin inhibitor heavy chain H3-like [ <i>Larimichthys crocea</i> ] | 309                        | 286                          | 102.46                | 89.21  | 5.44            | 4.5 | 13              | 1.64E-04             | 3.36E-01             | <b>1.58E-04</b> | -0.36           | <b>-1.61</b> |
|                                                        | XP_010753395.2             | PREDICTED: antithrombin-III [ <i>Larimichthys crocea</i> ]                                  | 197                        | 153                          | 51.04                 |        | 5.21            |     | 13              |                      |                      |                 |                 |              |
| 206                                                    | XP_019111370.1             | PREDICTED: inter-alpha-trypsin inhibitor heavy chain H3-like [ <i>Larimichthys crocea</i> ] | 353                        | 331                          | 102.46                | 89.21  | 5.44            | 4.5 | 11              | 2.66E-03             | 5.71E-01             | <b>2.63E-03</b> | -0.26           | <b>-1.66</b> |
| 209                                                    | XP_019111370.1             | PREDICTED: inter-alpha-trypsin inhibitor heavy chain H3-like [ <i>Larimichthys crocea</i> ] | 334                        | 295                          | 102.46                | 89.21  | 5.44            | 4.6 | 9               | 2.45E-04             | 2.14E-01             | <b>2.01E-04</b> | -0.49           | <b>-1.76</b> |
| 210                                                    | KKF19329.1                 | Inter-alpha-trypsin inhibitor heavy chain H3, partial [ <i>Larimichthys crocea</i> ]        | 363                        | 341                          | 87.84                 | 89.21  | 5.31            | 4.6 | 14              | 6.21E-03             | 2.61E-01             | <b>4.66E-03</b> | -0.39           | -0.94        |
| 224                                                    | XP_017260893.1             | alpha-2-macroglobulin, partial [ <i>Kryptolebias marmoratus</i> ]                           | 91                         | 91                           | 40.18                 | 85.07  | 5.21            | 5.4 | 1               | 7.01E-05             | <b>4.10E-02</b>      | <b>4.74E-05</b> | -0.62           | <b>-1.74</b> |
| 229                                                    | XP_017260893.1             | alpha-2-macroglobulin, partial [ <i>Kryptolebias marmoratus</i> ]                           | 115                        | 102                          | 40.18                 | 85.07  | 5.21            | 5.4 | 1               | 1.78E-04             | 9.29E-02             | <b>1.28E-04</b> | -0.46           | <b>-1.40</b> |
| 301                                                    | AWP20152.1                 | putative apolipoprotein B-100-like isoform 2 [ <i>Scophthalmus maximus</i> ]                | 186                        | 303                          | 422.92                | 75.52  | 4.99            | 5.1 | 27              | 2.45E-03             | <b>1.71E-02</b>      | <b>2.56E-03</b> | -0.65           | -0.90        |
| 316                                                    | AWP20152.1                 | putative apolipoprotein B-100-like isoform 2 [ <i>Scophthalmus maximus</i> ]                | 219                        | 219                          | 422.92                | 75.52  | 4.99            | 5.2 | 25              | 1.39E-02             | 1.23E-01             | <b>1.13E-02</b> | -0.88           | <b>-1.46</b> |

|     |                |                                                                                                                                                                                 |     |     |        |       |      |     |    |          |          |                 |             |             |
|-----|----------------|---------------------------------------------------------------------------------------------------------------------------------------------------------------------------------|-----|-----|--------|-------|------|-----|----|----------|----------|-----------------|-------------|-------------|
| 326 | XP_019111370.1 | PREDICTED: inter-alpha-trypsin inhibitor heavy chain H3-like [Larimichthys crocea]                                                                                              | 129 | 116 | 102.46 | 77.34 | 5.44 | 4.7 | 10 | 1.11E-02 | 8.39E-01 | <b>3.99E-02</b> | -0.10       | 0.50        |
| 327 | XP_023284462.1 | antihemorrhagic factor cHLP-B-like [Seriola lalandi dorsalis]                                                                                                                   | 350 | 367 | 56.45  |       | 5.97 |     | 10 |          |          |                 |             |             |
|     | AEA41139.1     | transferrin [Sparus aurata]                                                                                                                                                     | 738 | 645 | 74.28  | 75.52 | 5.93 | 5.7 | 24 | 7.85E-03 | 1.00E-01 | <b>6.12E-03</b> | -0.17       | -0.29       |
| 328 | XP_020489366.1 | fetuin-B-like [Labrus bergylta]                                                                                                                                                 | 276 | 246 | 55.36  | 77.34 | 6.04 | 4.5 | 6  | 2.11E-02 | 9.54E-01 | <b>2.88E-02</b> | 0.11        | 0.55        |
| 329 | XP_020506421.1 | hemopexin-like [Labrus bergylta]                                                                                                                                                | 194 | 185 | 49.06  | 77.34 | 5.48 | 4.8 | 6  | 2.35E-02 | 4.15E-01 | <b>1.86E-02</b> | 0.34        | 0.88        |
| 332 | XP_023285742.1 | alpha-1-antitrypsin homolog [Seriola lalandi dorsalis]                                                                                                                          | 216 | 178 | 46.70  | 77.34 | 5.61 | 4.6 | 6  | 2.19E-03 | 1.00E+00 | <b>5.01E-03</b> | 0.06        | 0.78        |
| 355 | XP_023285742.1 | alpha-1-antitrypsin homolog [Seriola lalandi dorsalis]                                                                                                                          | 294 | 259 | 46.70  | 72.01 | 5.61 | 5.3 | 6  | 4.81E-02 | 4.53E-01 | <b>3.88E-02</b> | -0.25       | -0.52       |
| 367 | XP_023285742.1 | alpha-1-antitrypsin homolog [Seriola lalandi dorsalis]                                                                                                                          | 92  | 66  | 46.70  | 72.01 | 5.61 | 5.4 | 8  | 2.38E-04 | 2.70E-01 | <b>2.08E-04</b> | <b>1.17</b> | <b>2.78</b> |
| 385 | XP_023285742.1 | alpha-1-antitrypsin homolog [Seriola lalandi dorsalis]                                                                                                                          | 137 | 96  | 46.70  | 70.32 | 5.61 | 5.1 | 11 | 7.17E-03 | 1.56E-01 | <b>5.30E-03</b> | -0.42       | -0.73       |
| 396 | XP_023285742.1 | alpha-1-antitrypsin homolog [Seriola lalandi dorsalis]                                                                                                                          | 247 | 181 | 46.70  | 70.32 | 5.61 | 5.2 | 10 | 1.55E-03 | 6.70E-02 | <b>1.10E-03</b> | -0.53       | -0.91       |
| 411 | XP_023285742.1 | alpha-1-antitrypsin homolog [Seriola lalandi dorsalis]                                                                                                                          | 325 | 263 | 46.70  | 70.32 | 5.61 | 5.3 | 12 | 2.13E-03 | 6.77E-02 | <b>1.54E-03</b> | -0.43       | -0.73       |
| 425 | AEA41139.1     | transferrin [Sparus aurata]                                                                                                                                                     | 741 | 675 | 74.28  | 67.05 | 5.93 | 5.6 | 18 | 1.49E-02 | 3.95E-01 | <b>1.18E-02</b> | 0.10        | 0.27        |
| 427 | AEA41139.1     | transferrin [Sparus aurata]                                                                                                                                                     | 544 | 491 | 74.28  | 67.05 | 5.93 | 5.7 | 15 | 2.47E-03 | 1.76E-01 | <b>1.79E-03</b> | 0.25        | 0.58        |
| 429 | AEA41139.1     | transferrin [Sparus aurata]                                                                                                                                                     | 297 | 243 | 74.28  | 67.05 | 5.93 | 6.1 | 9  | 3.54E-02 | 5.16E-01 | <b>2.92E-02</b> | 0.14        | 0.39        |
| 438 | XP_004544273.1 | serine protease inhibitor A3K [Maylandia zebra]                                                                                                                                 | 108 | 97  | 45.19  | 65.47 | 6.01 | 4.6 | 5  | 4.19E-02 | 3.44E-01 | <b>3.33E-02</b> | -0.33       | -0.71       |
| 446 | AFO64912.1     | alpha-1-antitrypsin [Oplegnathus fasciatus]                                                                                                                                     | 562 | 502 | 46.25  | 65.47 | 5.69 | 4.5 | 8  | 2.72E-03 | 4.61E-01 | <b>2.43E-03</b> | -0.19       | -0.77       |
| 451 | XP_006787579.1 | PREDICTED: beta-2-glycoprotein 1-like [Neolamprologus brichardi]                                                                                                                | 149 | 114 | 40.18  | 67.05 | 8.70 | 5.9 | 6  | 1.96E-02 | 4.05E-01 | <b>1.55E-02</b> | 0.19        | 0.50        |
| 491 | AEA41139.1     | transferrin [Sparus aurata]                                                                                                                                                     | 297 | 242 | 74.28  | 62.43 | 5.93 | 6   | 9  | 3.75E-02 | 6.96E-01 | <b>3.44E-02</b> | 0.13        | 0.43        |
| 497 | AEA41139.1     | transferrin [Sparus aurata]                                                                                                                                                     | 703 | 626 | 74.28  | 62.43 | 5.93 | 5.9 | 18 | 5.99E-03 | 5.43E-02 | <b>5.16E-03</b> | 0.43        | 0.62        |
| 499 | AEA41139.1     | transferrin [Sparus aurata]                                                                                                                                                     | 265 | 235 | 74.28  | 60.96 | 5.93 | 5.5 | 15 | 3.94E-03 | 5.17E-01 | <b>3.61E-03</b> | 0.17        | 0.60        |
| 502 | O42175.1       | RecName: Full=Apolipoprotein A-I; Short=Apo-AI; Short=ApoA-I; AltName: Full=Apolipoprotein A1; Contains: RecName: Full=Proapolipoprotein A-I; Short=ProapoA-I; Flags: Precursor | 115 | 67  | 29.63  | 59.53 | 5.20 | 4.8 | 8  | 1.17E-03 | 4.30E-01 | <b>1.37E-02</b> | -0.28       | <b>1.00</b> |
| 521 | KKF22678.1     | Fibrinogen alpha chain [Larimichthys crocea]                                                                                                                                    | 206 | 195 | 74.19  | 62.43 | 5.29 | 5.9 | 5  | 1.58E-02 | 9.80E-01 | <b>2.42E-02</b> | 0.20        | <b>1.52</b> |
|     | XP_023279907.1 | fibrinogen alpha chain isoform X2 [Seriola lalandi dorsalis]                                                                                                                    | 172 | 172 | 78.02  |       | 5.93 |     | 3  |          |          |                 |             |             |

|     |                |                                                                                                             |     |     |        |       |      |     |    |          |                 |                 |             |              |
|-----|----------------|-------------------------------------------------------------------------------------------------------------|-----|-----|--------|-------|------|-----|----|----------|-----------------|-----------------|-------------|--------------|
| 544 | KKF22678.1     | Fibrinogen alpha chain<br>[Larimichthys crocea]                                                             | 146 | 133 | 74.19  | 58.13 | 5.29 | 5.5 | 4  | 7.82E-03 | 3.67E-01        | <b>6.18E-03</b> | <b>1.33</b> | <b>2.26</b>  |
| 556 | XP_018550494.1 | PREDICTED: leucine-rich alpha-<br>2-glycoprotein-like [Lates<br>calcarifer]                                 | 274 | 256 | 37.60  | 58.13 | 5.89 | 4.3 | 4  | 2.70E-03 | 3.06E-01        | <b>2.13E-03</b> | 0.51        | <b>1.20</b>  |
| 557 | XP_023812997.1 | nucleoside diphosphate kinase B<br>[Oryzias latipes]                                                        | 327 | 301 | 16.98  | 58.13 | 6.89 | 4.4 | 7  | 1.43E-03 | 3.94E-01        | <b>1.26E-03</b> | 0.22        | 0.68         |
| 558 | AEA41139.1     | transferrin [Sparus aurata]                                                                                 | 124 | 103 | 74.28  | 56.76 | 5.93 | 5.6 | 11 | 2.34E-03 | 2.60E-01        | <b>1.79E-03</b> | -0.46       | <b>-2.18</b> |
| 559 | XP_018550494.1 | PREDICTED: leucine-rich alpha-<br>2-glycoprotein-like [Lates<br>calcarifer]                                 | 457 | 415 | 37.60  | 58.13 | 5.89 | 4.4 | 11 | 1.18E-03 | 5.24E-01        | <b>1.19E-03</b> | 0.13        | 0.53         |
|     | AFO64912.1     | alpha-1-antitrypsin [Oplegnathus<br>fasciatus]                                                              | 72  | 121 | 46.25  |       | 5.69 |     | 6  |          |                 |                 |             |              |
|     | AFO64912.1     | alpha-1-antitrypsin [Oplegnathus<br>fasciatus]                                                              | 260 | 243 | 46.25  |       | 5.69 |     | 5  |          |                 |                 |             |              |
| 586 | XP_018550494.1 | PREDICTED: leucine-rich alpha-<br>2-glycoprotein-like [Lates<br>calcarifer]                                 | 205 | 184 | 37.60  | 54.12 | 5.89 | 4.4 | 5  | 7.00E-03 | <b>1.53E-02</b> | <b>1.30E-02</b> | 0.48        | 0.46         |
| 589 | AEA41139.1     | transferrin [Sparus aurata]                                                                                 | 669 | 600 | 74.28  | 56.76 | 5.93 | 5.8 | 21 | 5.49E-03 | 2.82E-01        | <b>4.17E-03</b> | -0.25       | -0.82        |
| 591 | ADM13620.1     | complement component c3<br>[Sparus aurata]                                                                  | 337 | 326 | 185.32 | 55.43 | 8.08 | 4.9 | 12 | 1.42E-02 | 2.88E-01        | <b>1.08E-02</b> | -0.46       | <b>-1.22</b> |
| 593 | ADM13620.1     | complement component c3<br>[Sparus aurata]                                                                  | 603 | 551 | 185.32 | 55.43 | 8.08 | 5.1 | 22 | 7.23E-03 | 4.42E-01        | <b>6.02E-03</b> | <b>1.00</b> | <b>2.13</b>  |
| 595 | ADM13620.1     | complement component c3<br>[Sparus aurata]                                                                  | 667 | 606 | 185.32 | 55.43 | 8.08 | 5.2 | 31 | 2.79E-03 | 1.93E-01        | <b>2.04E-03</b> | <b>1.08</b> | <b>2.06</b>  |
| 600 | XP_020506421.1 | hemopexin-like [Labrus bergylta]<br>warm temperature acclimation<br>protein 65-2 [Lateolabrax<br>japonicus] | 222 | 253 | 49.06  | 54.12 | 5.48 | 4.4 | 6  | 1.47E-04 | <b>4.61E-03</b> | <b>1.19E-04</b> | 0.53        | 0.81         |
| 604 | CCA29190.1     | alpha-1-antitrypsin [Oplegnathus<br>fasciatus]                                                              | 147 | 118 | 48.73  | 55.43 | 5.22 | 4.3 | 13 | 1.95E-04 | <b>1.21E-02</b> | <b>1.39E-04</b> | 0.51        | 0.84         |
|     | AFO64912.1     | putative apolipoprotein B-100-<br>like isoform 2 [Scophthalmus<br>maximus]                                  | 93  | 93  | 46.25  |       | 5.69 |     | 2  |          |                 |                 |             |              |
| 613 | AWP20152.1     | alpha-1-antitrypsin homolog<br>[Seriola lalandi dorsalis]                                                   | 173 | 175 | 422.92 | 54.12 | 4.99 | 5.4 | 6  | 1.73E-02 | 2.06E-01        | <b>1.33E-02</b> | -0.30       | -0.59        |
| 621 | XP_023285742.1 | transferrin [Sparus aurata]                                                                                 | 134 | 84  | 46.70  | 52.85 | 5.61 | 4.6 | 10 | 2.79E-02 | 1.52E-01        | <b>2.42E-02</b> | -0.46       | -0.89        |
| 624 | AEA41139.1     | beta-actin, partial [Gobiocypris<br>rarus]                                                                  | 447 | 391 | 74.28  | 54.12 | 5.93 | 5.8 | 6  | 3.08E-02 | 5.99E-01        | <b>2.67E-02</b> | 0.10        | 0.34         |
| 632 | ABP35641.1     | transferrin [Sparus aurata]                                                                                 | 337 | 286 | 38.97  | 52.85 | 5.20 | 5.2 | 7  | 6.60E-04 | <b>2.11E-02</b> | <b>4.93E-04</b> | 0.98        | <b>1.65</b>  |
| 654 | AEA41139.1     | haptoglobin [Sparus aurata]                                                                                 | 552 | 473 | 74.28  | 52.85 | 5.93 | 5.9 | 17 | 4.05E-02 | 3.03E-01        | <b>3.23E-02</b> | 0.19        | 0.39         |
| 663 | ARI46218.1     | PREDICTED: apolipoprotein B-<br>100-like [Paralichthys olivaceus]                                           | 139 | 103 | 34.94  | 50.40 | 7.62 | 4.9 | 5  | 3.06E-04 | <b>2.51E-02</b> | <b>2.10E-04</b> | 0.65        | <b>1.09</b>  |
| 677 | XP_019953039.1 | kininogen-1-like isoform X2<br>[Anabas testudineus]                                                         | 93  | 61  | 417.56 | 50.40 | 5.09 | 5   | 22 | 5.09E-06 | <b>1.57E-03</b> | <b>3.31E-06</b> | <b>1.42</b> | <b>2.32</b>  |
|     | XP_026202291.1 |                                                                                                             | 82  | 70  | 48.45  |       | 5.84 |     | 3  |          |                 |                 |             |              |

|     |                |                                                                                                                                                                                 |      |     |       |       |      |     |    |          |                 |                 |              |              |
|-----|----------------|---------------------------------------------------------------------------------------------------------------------------------------------------------------------------------|------|-----|-------|-------|------|-----|----|----------|-----------------|-----------------|--------------|--------------|
| 682 | AEA41139.1     | transferrin [Sparus aurata]                                                                                                                                                     | 295  | 273 | 74.28 | 49.21 | 5.93 | 5.8 | 7  | 6.20E-03 | 1.64E-01        | <b>4.54E-03</b> | -0.39        | -0.70        |
| 708 | AEA41139.1     | transferrin [Sparus aurata]                                                                                                                                                     | 656  | 606 | 74.28 | 48.05 | 8.31 | 4.7 | 14 | 1.90E-03 | 3.57E-01        | <b>1.59E-03</b> | 0.15         | 0.46         |
| 710 | ARI46218.1     | haptoglobin [Sparus aurata]                                                                                                                                                     | 345  | 274 | 74.28 | 48.05 | 5.93 | 5.6 | 10 | 2.72E-05 | <b>2.04E-04</b> | <b>4.40E-05</b> | <b>1.39</b>  | <b>1.53</b>  |
| 715 | O42175.1       | RecName: Full=Apolipoprotein A-I; Short=Apo-AI; Short=ApoA-I; AltName: Full=Apolipoprotein A1; Contains: RecName: Full=Proapolipoprotein A-I; Short=ProapoA-I; Flags: Precursor | 327  | 219 | 34.94 | 46.92 | 7.62 | 5.2 | 17 | 3.64E-04 | <b>2.26E-02</b> | <b>2.55E-04</b> | <b>1.44</b>  | <b>2.20</b>  |
| 736 | AJW65884.1     | Hyaluronic acid binding protein 2 [Sparus aurata]                                                                                                                               | 261  | 271 | 69.16 | 44.74 | 5.68 | 4.7 | 11 | 2.18E-03 | 3.59E-01        | <b>1.81E-03</b> | -0.33        | <b>-1.53</b> |
| 737 | XP_008277007.1 | PREDICTED: complement factor B-like [Stegastes partitus]                                                                                                                        | 128  | 122 | 29.63 | 46.92 | 5.20 | 4.4 | 2  | 5.79E-07 | 5.17E-01        | <b>1.04E-06</b> | -0.31        | <b>-2.52</b> |
| 751 | AEA41139.1     | transferrin [Sparus aurata]                                                                                                                                                     | 282  | 256 | 74.28 | 43.69 | 5.61 | 4.9 | 5  | 6.24E-05 | 5.81E-01        | <b>8.46E-05</b> | -0.16        | <b>-1.25</b> |
| 778 | AEA41139.1     | transferrin [Sparus aurata]                                                                                                                                                     | 318  | 275 | 74.28 | 42.66 | 5.93 | 5   | 6  | 3.94E-03 | 1.26E-01        | <b>2.85E-03</b> | -0.28        | -0.57        |
| 796 | ACN54269.1     | warm temperature acclimation-related 65 kDa protein [Sparus aurata]                                                                                                             | 198  | 165 | 49.16 | 42.66 | 5.93 | 5.2 | 7  | 4.03E-06 | <b>1.20E-04</b> | <b>4.00E-06</b> | 0.85         | <b>1.13</b>  |
| 833 | ACN54269.1     | warm temperature acclimation-related 65 kDa protein [Sparus aurata]                                                                                                             | 175  | 159 | 49.16 | 39.72 | 5.41 | 5.2 | 9  | 4.06E-03 | 7.06E-02        | <b>3.10E-03</b> | <b>-1.01</b> | <b>-1.86</b> |
| 841 | O42175.1       | RecName: Full=Apolipoprotein A-I; Short=Apo-AI; Short=ApoA-I; AltName: Full=Apolipoprotein A1; Contains: RecName: Full=Proapolipoprotein A-I; Short=ProapoA-I; Flags: Precursor | 116  | 104 | 49.16 | 34.44 | 5.41 | 5.3 | 2  | 6.51E-06 | 5.06E-02        | <b>5.02E-06</b> | -0.48        | <b>-1.40</b> |
| 843 | AEA41139.1     | transferrin [Sparus aurata]                                                                                                                                                     | 350  | 328 | 74.28 | 35.27 | 5.20 | 4.9 | 11 | 3.24E-03 | 7.08E-01        | <b>3.63E-03</b> | -0.21        | <b>-1.96</b> |
| 864 | APO15792.1     | apolipoprotein Eb [Sparus aurata]                                                                                                                                               | 613  | 511 | 74.28 | 35.27 | 5.93 | 6.2 | 17 | 1.47E-04 | 8.47E-01        | <b>2.59E-04</b> | <b>1.60</b>  | <b>3.68</b>  |
| 869 | APO15792.1     | apolipoprotein Eb [Sparus aurata]                                                                                                                                               | 1070 | 851 | 30.99 | 35.27 | 4.81 | 4.7 | 24 | 1.93E-03 | 1.33E-01        | <b>1.37E-03</b> | <b>1.41</b>  | <b>2.26</b>  |
| 877 | BAM36361.1     | pentraxin [Oplegnathus fasciatus]                                                                                                                                               | 183  | 177 | 25.59 |       | 5.72 |     | 4  |          |                 |                 |              |              |
|     | XP_022604055.1 | kininogen-1-like [Seriola dumerilii]                                                                                                                                            | 114  | 179 | 39.99 | 32.84 | 5.00 | 5.1 | 3  | 1.65E-04 | <b>1.14E-04</b> | <b>1.39E-02</b> | <b>-1.24</b> | -0.73        |
| 904 | AEA41139.1     | transferrin [Sparus aurata]                                                                                                                                                     | 430  | 411 | 74.28 | 29.86 | 5.93 | 5.6 | 9  | 3.09E-03 | 1.20E-01        | <b>2.21E-03</b> | -0.46        | <b>-1.17</b> |
| 905 | O42175.1       | RecName: Full=Apolipoprotein A-I; Short=Apo-AI; Short=ApoA-I; AltName: Full=Apolipoprotein A1; Contains: RecName: Full=Proapolipoprotein A-I;                                   | 193  | 137 | 29.63 | 30.57 | 5.20 | 5.7 | 12 | 1.15E-03 | 5.45E-02        | <b>8.11E-04</b> | <b>-1.46</b> | <b>-2.63</b> |

|     |                |                                                                                                                                                                                                                                                                                                                                                                                                                                           |     |     |       |       |      |     |    |          |                 |                 |              |              |
|-----|----------------|-------------------------------------------------------------------------------------------------------------------------------------------------------------------------------------------------------------------------------------------------------------------------------------------------------------------------------------------------------------------------------------------------------------------------------------------|-----|-----|-------|-------|------|-----|----|----------|-----------------|-----------------|--------------|--------------|
| 907 | O42175.1       | Short=ProapoA-I; Flags:<br>Precursor<br>RecName: Full=Apolipoprotein A-I; Short=Apo-AI; Short=ApoA-I; AltName: Full=Apolipoprotein A1; Contains: RecName: Full=Proapolipoprotein A-I; Short=ProapoA-I; Flags:<br>Precursor<br>RecName: Full=Apolipoprotein A-I; Short=Apo-AI; Short=ApoA-I; AltName: Full=Apolipoprotein A1; Contains: RecName: Full=Proapolipoprotein A-I; Short=ProapoA-I; Flags:<br>Precursor                          | 356 | 263 | 29.64 | 31.57 | 5.20 | 5.7 | 16 | 1.27E-02 | 8.76E-01        | <b>4.07E-02</b> | 0.11         | -0.57        |
| 908 | O42175.1       | Short=ProapoA-I; Flags:<br>Precursor<br>RecName: Full=Apolipoprotein A-I; Short=Apo-AI; Short=ApoA-I; AltName: Full=Apolipoprotein A1; Contains: RecName: Full=Proapolipoprotein A-I; Short=ProapoA-I; Flags:<br>Precursor<br>RecName: Full=Apolipoprotein A-I; Short=Apo-AI; Short=ApoA-I; AltName: Full=Apolipoprotein A1; Contains: RecName: Full=Proapolipoprotein A-I; Short=ProapoA-I; Flags:<br>Precursor                          | 536 | 381 | 29.63 | 29.86 | 5.20 | 4.7 | 22 | 7.59E-05 | <b>3.00E-02</b> | <b>5.04E-05</b> | <b>1.27</b>  | <b>2.31</b>  |
| 919 | O42175.1       | Short=ProapoA-I; Flags:<br>Precursor<br>RecName: Full=Apolipoprotein A-I; Short=Apo-AI; Short=ApoA-I; AltName: Full=Apolipoprotein A1; Contains: RecName: Full=Proapolipoprotein A-I; Short=ProapoA-I; Flags:<br>Precursor<br>RecName: Full=Apolipoprotein A-I; Short=Apo-AI; Short=ApoA-I; AltName: Full=Apolipoprotein A1; Contains: RecName: Full=Proapolipoprotein A-I; Short=ProapoA-I; Flags:<br>Precursor                          | 477 | 297 | 29.63 | 29.86 | 5.20 | 4.4 | 22 | 1.01E-03 | 1.37E-01        | <b>7.19E-04</b> | -0.48        | <b>-1.16</b> |
| 928 | O42175.1       | Short=ProapoA-I; Flags:<br>Precursor<br>RecName: Full=Apolipoprotein A-I; Short=Apo-AI; Short=ApoA-I; AltName: Full=Apolipoprotein A1; Contains: RecName: Full=Proapolipoprotein A-I; Short=ProapoA-I; Flags:<br>Precursor<br>RecName: Full=Apolipoprotein A-I; Short=Apo-AI; Short=ApoA-I; AltName: Full=Apolipoprotein A1; Contains: RecName: Full=Proapolipoprotein A-I; Short=ProapoA-I; Flags:<br>Precursor                          | 236 | 153 | 29.63 | 29.15 | 5.20 | 5.1 | 15 | 8.23E-04 | 3.85E-01        | <b>7.44E-04</b> | -0.23        | -0.81        |
| 932 | XP_023284462.1 | antihemorrhagic factor cHLP-B-like [Seriola lalandi dorsalis]<br>RecName: Full=Apolipoprotein A-I; Short=Apo-AI; Short=ApoA-I; AltName: Full=Apolipoprotein A1; Contains: RecName: Full=Proapolipoprotein A-I; Short=ProapoA-I; Flags:<br>Precursor<br>RecName: Full=Apolipoprotein A-I; Short=Apo-AI; Short=ApoA-I; AltName: Full=Apolipoprotein A1; Contains: RecName: Full=Proapolipoprotein A-I; Short=ProapoA-I; Flags:<br>Precursor | 445 | 396 | 56.45 | 29.86 | 5.97 | 6.4 | 7  | 1.06E-02 | 1.57E-01        | <b>8.02E-03</b> | -0.48        | -0.82        |
| 937 | O42175.1       | Short=ProapoA-I; Flags:<br>Precursor<br>RecName: Full=Apolipoprotein A-I; Short=Apo-AI; Short=ApoA-I; AltName: Full=Apolipoprotein A1; Contains: RecName: Full=Proapolipoprotein A-I; Short=ProapoA-I; Flags:<br>Precursor<br>RecName: Full=Apolipoprotein A-I; Short=Apo-AI; Short=ApoA-I; AltName: Full=Apolipoprotein A1; Contains: RecName: Full=Proapolipoprotein A-I; Short=ProapoA-I; Flags:<br>Precursor                          | 226 | 179 | 29.63 | 28.47 | 5.20 | 4.9 | 10 | 1.04E-04 | 1.53E-01        | <b>8.34E-05</b> | -0.56        | <b>-1.59</b> |
| 939 | O42175.1       | Short=ProapoA-I; Flags:<br>Precursor<br>RecName: Full=Apolipoprotein A-I; Short=Apo-AI; Short=ApoA-I; AltName: Full=Apolipoprotein A1; Contains: RecName: Full=Proapolipoprotein A-I; Short=ProapoA-I; Flags:<br>Precursor<br>RecName: Full=Apolipoprotein A-I; Short=Apo-AI; Short=ApoA-I; AltName: Full=Apolipoprotein A1; Contains: RecName: Full=Proapolipoprotein A-I; Short=ProapoA-I; Flags:<br>Precursor                          | 489 | 310 | 29.63 | 28.47 | 5.20 | 5.1 | 23 | 1.31E-05 | <b>1.39E-03</b> | <b>9.29E-06</b> | <b>-1.06</b> | <b>-1.68</b> |

|     |                |                                                                                                                                                                                                                            |     |     |       |       |      |     |    |          |                 |                 |              |              |
|-----|----------------|----------------------------------------------------------------------------------------------------------------------------------------------------------------------------------------------------------------------------|-----|-----|-------|-------|------|-----|----|----------|-----------------|-----------------|--------------|--------------|
| 950 | O42175.1       | Short=ProapoA-I; Flags:<br>Precursor<br>RecName: Full=Apolipoprotein A-I; Short=Apo-AI; Short=ApoA-I; AltName: Full=Apolipoprotein A1; Contains: RecName: Full=Proapolipoprotein A-I; Short=ProapoA-I; Flags:<br>Precursor | 176 | 109 | 29.63 | 27.80 | 5.20 | 5.8 | 14 | 7.67E-04 | <b>1.42E-02</b> | <b>6.37E-04</b> | 0.48         | 0.73         |
| 954 | XP_008297163.1 | PREDICTED: hemopexin-like [Stegastes partitus]                                                                                                                                                                             | 95  | 95  | 48.51 |       | 5.39 |     | 2  |          |                 |                 |              |              |
| 959 | XP_014909301.1 | PREDICTED: hemopexin-like [Poecilia latipinna]                                                                                                                                                                             | 246 | 205 | 47.86 | 27.80 | 5.33 | 5.5 | 10 | 3.76E-04 | <b>3.33E-04</b> | <b>6.64E-03</b> | <b>-1.03</b> | -0.76        |
| 959 | XP_020489366.1 | fetuin-B-like [Labrus bergylta]                                                                                                                                                                                            | 154 | 123 | 55.36 |       | 6.04 |     | 9  |          | <b>2.67E-02</b> | <b>8.05E-03</b> |              |              |
| 959 | XP_018541719.1 | PREDICTED: C-reactive protein-like [Lates calcarifer]                                                                                                                                                                      | 132 | 117 | 25.24 | 27.80 | 5.20 | 6.4 | 7  | 6.70E-03 |                 |                 | -0.47        | -0.55        |
| 967 | O42175.1       | RecName: Full=Apolipoprotein A-I; Short=Apo-AI; Short=ApoA-I; AltName: Full=Apolipoprotein A1; Contains: RecName: Full=Proapolipoprotein A-I; Short=ProapoA-I; Flags:<br>Precursor                                         | 373 | 222 | 29.63 | 26.51 | 5.20 | 4.9 | 22 | 9.35E-04 | <b>1.78E-02</b> | <b>7.62E-04</b> | <b>-1.57</b> | <b>-3.09</b> |
| 970 | O42175.1       | RecName: Full=Apolipoprotein A-I; Short=Apo-AI; Short=ApoA-I; AltName: Full=Apolipoprotein A1; Contains: RecName: Full=Proapolipoprotein A-I; Short=ProapoA-I; Flags:<br>Precursor                                         | 234 | 120 | 29.63 | 25.88 | 5.20 | 5.1 | 18 | 1.59E-05 | 8.26E-02        | <b>1.27E-05</b> | -0.33        | -0.98        |
| 984 | XP_008297163.1 | PREDICTED: hemopexin-like [Stegastes partitus]                                                                                                                                                                             | 223 | 164 | 48.51 | 24.68 | 5.39 | 5.4 | 6  | 3.15E-04 | 4.99E-01        | <b>3.43E-04</b> | -0.14        | -0.59        |
| 987 | XP_008297163.1 | PREDICTED: hemopexin-like [Stegastes partitus]                                                                                                                                                                             | 180 | 131 | 48.51 | 25.27 | 5.39 | 5.9 | 8  | 1.48E-02 | 3.26E-01        | <b>1.13E-02</b> | 0.19         | 0.46         |
| 990 | APO15792.1     | apolipoprotein Eb [Sparus aurata]                                                                                                                                                                                          | 242 | 220 | 30.99 |       | 4.81 |     | 7  |          |                 |                 |              |              |
| 990 | XP_010742296.3 | apolipoprotein A-I [Larimichthys crocea]                                                                                                                                                                                   | 86  | 78  | 28.82 | 24.68 | 4.62 | 4.7 | 3  | 4.95E-03 | 8.38E-01        | <b>1.96E-02</b> | 0.25         | <b>-1.50</b> |
| 991 | AEA41139.1     | transferrin [Sparus aurata]                                                                                                                                                                                                | 583 | 406 | 74.28 | 24.68 | 5.93 | 5.4 | 14 | 1.60E-03 | 2.11E-01        | <b>1.20E-03</b> | 0.19         | 0.48         |
| 996 | APO15792.1     | apolipoprotein Eb [Sparus aurata]                                                                                                                                                                                          | 593 | 489 | 30.99 |       | 4.81 |     | 18 |          |                 |                 |              |              |
| 996 | AWO96305.1     | putative apolipoprotein A-IV-like [Scophthalmus maximus]                                                                                                                                                                   | 191 | 169 | 28.81 | 24.10 | 4.62 | 4.6 | 6  | 2.91E-05 | 6.55E-01        | <b>4.55E-05</b> | -0.10        | <b>-3.04</b> |
| 997 | XP_010742296.3 | apolipoprotein A-I [Larimichthys crocea]                                                                                                                                                                                   | 134 | 103 | 28.82 | 24.10 | 4.62 | 4.5 | 7  | 1.20E-05 | 6.89E-02        | <b>9.41E-06</b> | -0.92        | <b>-4.04</b> |

|      |                |                                                                                                                                                                                 |     |     |        |       |      |     |    |          |                 |                 |       |              |
|------|----------------|---------------------------------------------------------------------------------------------------------------------------------------------------------------------------------|-----|-----|--------|-------|------|-----|----|----------|-----------------|-----------------|-------|--------------|
| 998  | O42175.1       | RecName: Full=Apolipoprotein A-I; Short=Apo-AI; Short=ApoA-I; AltName: Full=Apolipoprotein A1; Contains: RecName: Full=Proapolipoprotein A-I; Short=ProapoA-I; Flags: Precursor | 278 | 143 | 29.63  | 23.53 | 5.20 | 5.1 | 18 | 1.97E-04 | 2.72E-01        | <b>1.75E-04</b> | -0.29 | -0.99        |
| 1004 | O42175.1       | RecName: Full=Apolipoprotein A-I; Short=Apo-AI; Short=ApoA-I; AltName: Full=Apolipoprotein A1; Contains: RecName: Full=Proapolipoprotein A-I; Short=ProapoA-I; Flags: Precursor | 423 | 336 | 29.63  | 22.98 | 5.20 | 5   | 12 | 5.83E-05 | 1.28E-01        | <b>4.65E-05</b> | -0.34 | <b>-1.10</b> |
| 1014 | XP_013872926.1 | PREDICTED: calcium/calmodulin-dependent protein kinase type II subunit delta-like [Austrofundulus limnaeus]                                                                     | 168 | 223 | 41.19  | 22.98 | 6.84 | 5.2 | 7  | 8.52E-05 | <b>3.75E-03</b> | <b>6.58E-05</b> | -0.77 | <b>-1.27</b> |
| 1016 | O42175.1       | RecName: Full=Apolipoprotein A-I; Short=Apo-AI; Short=ApoA-I; AltName: Full=Apolipoprotein A1; Contains: RecName: Full=Proapolipoprotein A-I; Short=ProapoA-I; Flags: Precursor | 350 | 265 | 29.63  | 22.44 | 5.20 | 5   | 13 | 4.96E-05 | <b>3.91E-02</b> | <b>3.37E-05</b> | -0.64 | <b>-1.83</b> |
| 1021 | O42175.1       | RecName: Full=Apolipoprotein A-I; Short=Apo-AI; Short=ApoA-I; AltName: Full=Apolipoprotein A1; Contains: RecName: Full=Proapolipoprotein A-I; Short=ProapoA-I; Flags: Precursor | 305 | 262 | 29.63  | 22.44 | 5.20 | 5   | 7  | 1.14E-02 | 9.40E-01        | <b>3.09E-02</b> | 0.04  | <b>-1.70</b> |
| 1048 | ADM13620.1     | complement component c3 [Sparus aurata]                                                                                                                                         | 236 | 188 | 185.32 | 23.53 | 8.08 | 5.1 | 11 | 3.53E-04 | 2.79E-01        | <b>3.04E-04</b> | -0.50 | <b>-1.84</b> |
| 1071 | XP_020489366.1 | fetuin-B-like [Labrus bergylta]                                                                                                                                                 | 283 | 253 | 55.36  | 19.00 | 6.04 | 4.8 | 9  | 1.66E-02 | 1.38E-01        | <b>1.34E-02</b> | -0.40 | -0.77        |
| 1072 | XP_020489366.1 | fetuin-B-like [Labrus bergylta]                                                                                                                                                 | 323 | 366 | 55.36  | 18.55 | 6.04 | 6.2 | 7  | 3.32E-03 | 1.42E-01        | <b>2.39E-03</b> | -0.47 | <b>-1.07</b> |
| 1079 | AEA41139.1     | transferrin [Sparus aurata]                                                                                                                                                     | 220 | 209 | 74.28  | 19.00 | 5.93 | 5.8 | 10 | 1.90E-03 | 5.08E-02        | <b>1.41E-03</b> | -0.60 | <b>-1.19</b> |
| 1083 | ADM13620.1     | complement component c3 [Sparus aurata]                                                                                                                                         | 502 | 558 | 185.32 | 18.55 | 8.08 | 5   | 19 | 6.44E-03 | 8.01E-01        | <b>7.57E-03</b> | 0.97  | <b>2.28</b>  |
| 1096 | XP_023284462.1 | antihemorrhagic factor cHLP-B-like [Seriola lalandi dorsalis]                                                                                                                   | 292 | 273 | 56.45  | 18.11 | 5.97 | 5.1 | 7  | 1.07E-02 | 2.08E-01        | <b>8.02E-03</b> | -0.35 | -0.72        |
| 1103 | AEA41139.1     | transferrin [Sparus aurata]                                                                                                                                                     | 502 | 466 | 74.28  | 18.11 | 5.93 | 5.2 | 10 | 3.70E-02 | 3.33E-01        | <b>2.92E-02</b> | 0.25  | 0.49         |
| 1144 | O42175.1       | RecName: Full=Apolipoprotein A-I; Short=Apo-AI; Short=ApoA-I;                                                                                                                   | 202 | 158 | 29.63  | 15.70 | 5.20 | 4.8 | 10 | 4.86E-03 | 6.20E-02        | <b>3.90E-03</b> | 0.58  | 0.86         |

|      |                |                                                                                                                                                                                                                                                                                                         |     |     |       |       |      |     |    |          |          |                 |       |              |
|------|----------------|---------------------------------------------------------------------------------------------------------------------------------------------------------------------------------------------------------------------------------------------------------------------------------------------------------|-----|-----|-------|-------|------|-----|----|----------|----------|-----------------|-------|--------------|
| 1151 | O42175.1       | l; AltName: Full=Apolipoprotein A1; Contains: RecName: Full=Proapolipoprotein A-I; Short=ProapoA-I; Flags: Precursor<br>RecName: Full=Apolipoprotein A-I; Short=Apo-AI; Short=ApoA-I; AltName: Full=Apolipoprotein A1; Contains: RecName: Full=Proapolipoprotein A-I; Short=ProapoA-I; Flags: Precursor | 489 | 408 | 29.63 | 15.70 | 5.20 | 4.9 | 14 | 2.77E-04 | 5.66E-02 | <b>1.88E-04</b> | -0.69 | <b>-1.64</b> |
| 1157 | O42175.1       | RecName: Full=Apolipoprotein A-I; Short=Apo-AI; Short=ApoA-I; AltName: Full=Apolipoprotein A1; Contains: RecName: Full=Proapolipoprotein A-I; Short=ProapoA-I; Flags: Precursor                                                                                                                         | 136 | 119 | 29.63 | 15.33 | 5.20 | 5   | 3  | 2.79E-02 | 1.49E-01 | <b>2.43E-02</b> | 0.25  | 0.38         |
|      | XP_017288315.2 | hemopexin-like [Kryptolebias marmoratus]<br>RecName: Full=Apolipoprotein A-I; Short=Apo-AI; Short=ApoA-I; AltName: Full=Apolipoprotein A1; Contains: RecName: Full=Proapolipoprotein A-I; Short=ProapoA-I; Flags: Precursor                                                                             | 169 | 132 | 50.58 |       | 5.97 |     | 5  |          |          |                 |       |              |
| 1178 | O42175.1       | RecName: Full=Apolipoprotein A-I; Short=Apo-AI; Short=ApoA-I; AltName: Full=Apolipoprotein A1; Contains: RecName: Full=Proapolipoprotein A-I; Short=ProapoA-I; Flags: Precursor                                                                                                                         | 332 | 225 | 29.63 | 14.28 | 5.20 | 5.5 | 18 | 2.81E-03 | 2.58E-01 | <b>2.14E-03</b> | -0.31 | -0.76        |
| 1221 | O42175.1       | RecName: Full=Apolipoprotein A-I; Short=Apo-AI; Short=ApoA-I; AltName: Full=Apolipoprotein A1; Contains: RecName: Full=Proapolipoprotein A-I; Short=ProapoA-I; Flags: Precursor                                                                                                                         | 282 | 190 | 29.63 | 12.09 | 5.20 | 5.5 | 17 | 1.20E-03 | 2.32E-01 | <b>9.22E-04</b> | -0.42 | <b>-1.14</b> |
| 1238 | O42175.1       | RecName: Full=Apolipoprotein A-I; Short=Apo-AI; Short=ApoA-I; AltName: Full=Apolipoprotein A1; Contains: RecName: Full=Proapolipoprotein A-I; Short=ProapoA-I; Flags: Precursor                                                                                                                         | 445 | 344 | 29.63 | 11.80 | 5.20 | 5.3 | 12 | 3.01E-04 | 5.16E-01 | <b>3.35E-04</b> | -0.25 | <b>-1.19</b> |
| 1250 | O42175.1       | RecName: Full=Apolipoprotein A-I; Short=Apo-AI; Short=ApoA-I; AltName: Full=Apolipoprotein                                                                                                                                                                                                              | 398 | 315 | 29.63 | 11.25 | 5.20 | 5.2 | 16 | 2.09E-04 | 1.30E-01 | <b>1.56E-04</b> | -0.37 | <b>-1.00</b> |



A1; Contains: RecName:  
Full=Proapolipoprotein A-I;  
Short=ProapoA-I; Flags:  
Precursor

Differential protein spots identified in the HYP trial

|     |            |                                            |     |     |        |       |      |     |    |          |                 |                 |       |       |
|-----|------------|--------------------------------------------|-----|-----|--------|-------|------|-----|----|----------|-----------------|-----------------|-------|-------|
| 130 | BAA95137.1 | myosin light chain 2 [Trachurus trachurus] | 734 | 640 | 19.03  | 82.11 | 4.68 | 5.1 | 11 | 1.38E-02 | <b>4.41E-02</b> | <b>1.67E-02</b> | -0.44 | -0.37 |
| 400 | ADM13620.1 | complement component c3 [Sparus aurata]    | 326 | 302 | 185.32 | 47.31 | 8.08 | 4.5 | 22 | 4.82E-04 | <b>3.30E-04</b> | <b>4.04E-02</b> | -0.36 | -0.66 |

<sup>a</sup> Spot no. – number of the spot in the 2D gel (Fig.3), attributed by the SameSpots software

<sup>b</sup> Accession number – NCBI accession number

<sup>c</sup> Protein ID – protein identification by MALDI-TOF/TOF MS

<sup>d</sup> Protein Score – a non-probabilistic protein score obtained by Peptide mass fingerprinting (significance was given to  $> 76$ ,  $P < 0.05$ ) and MS/MS search.

<sup>e</sup> Total ion Score – sum of the individual ion scores given to the peptides matched to the protein in MS/MS (significance was given when the total ion score of a maximum of 3 peptides was  $> 60$ )

<sup>f</sup> Theoretical and observed molecular weight (Mw) – theoretical Mw was obtained through the bioinformatic tool ProtParam (<https://web.expasy.org/protparam/>)

<sup>g</sup> Theoretical and observed isoelectric point (pI) - theoretical pI was obtained through the bioinformatic tool ProtParam (<https://web.expasy.org/protparam/>)

<sup>h</sup> PC – peptide count matched to entry

<sup>i</sup> *p-value* - *p-value* of the one-way ANOVA for the control/treated,  $P < 0.05$

<sup>j</sup> *q-value* - *q-value* of the post-hoc multiple comparison Tukey HSD test. Bold lettering indicates significant differences (95% confidence interval).

<sup>k</sup> FC - Log<sub>2</sub>(fold-change) - significant changes in protein abundance (treated/control): T1 – OC30, NET2 or HYP30, T2 – OC45, NET4 or HYP15. Bold lettering indicates significant fold-changes ( $> 1.0$  and  $< -1.0$ ).
