# Supplementary material for: Protein changes as robust signatures of fish chronic stress: a proteomics approach to fish welfare research
Source: PubMed Central journal article supplement (PMC7168993; doi:10.1186/s12864-020-6728-4), 2020-04-19
Supplement: 12864_2020_6728_MOESM3_ESM.pdf [file 12864_2020_6728_MOESM3_ESM.pdf]

**Additional file 3.** List of the overrepresented terms in the GO Enrichment analysis of the 18 proteins showing significantly differential abundance between control and NET treatments (hypergeometric test, FDR < 0.05).

| GO Term                                                                         | Corrected <i>p</i> -value | Proteins in test set                   |
|---------------------------------------------------------------------------------|---------------------------|----------------------------------------|
| GO Biological Process                                                           |                           |                                        |
| response to stimulus (GO:50896)                                                 | 1.3471E-3                 | ZGC:158446 FGA HPX C3B SERPINC1 TFA    |
| response to chemical stimulus (GO:42221)                                        | 2.2140E-2                 | HPX C3B SERPINC1                       |
| response to bacterium (GO:9617)                                                 | 2.2140E-2                 | ZGC:158446 TFA                         |
| response to other organism (GO:51707)                                           | 2.3152E-2                 | ZGC:158446 TFA                         |
| multi-organism process (GO:51704)                                               | 2.3152E-2                 | ZGC:158446 TFA                         |
| response to biotic stimulus (GO:9607)                                           | 2.3152E-2                 | ZGC:158446 TFA                         |
| complement activation (GO:6956)                                                 | 2.3152E-2                 | ZGC:158446                             |
| activation of plasma proteins involved in acute inflammatory response (GO:2541) | 2.3152E-2                 | ZGC:158446                             |
| response to wounding (GO:9611)                                                  | 2.7276E-2                 | ZGC:158446 FGA                         |
| humoral immune response (GO:6959)                                               | 2.7771E-2                 | ZGC:158446                             |
| acute inflammatory response (GO:2526)                                           | 3.3649E-2                 | ZGC:158446                             |
| activation of immune response (GO:2253)                                         | 3.4672E-2                 | ZGC:158446                             |
| hyaluronan metabolic process (GO:30212)                                         | 3.4672E-2                 | ZGC:110377                             |
| positive regulation of immune response (GO:50778)                               | 3.4672E-2                 | ZGC:158446                             |
| protein maturation by peptide bond cleavage (GO:51605)                          | 3.4672E-2                 | ZGC:158446                             |
| platelet activation (GO:30168)                                                  | 3.4672E-2                 | FGA                                    |
| positive regulation of immune system process (GO:2684)                          | 3.8056E-2                 | ZGC:158446                             |
| regulation of immune response (GO:50776)                                        | 3.8899E-2                 | ZGC:158446                             |
| immune effector process (GO:2252)                                               | 3.8899E-2                 | ZGC:158446                             |
| GO Molecular function                                                           |                           |                                        |
| endopeptidase inhibitor activity (GO:4866)                                      | 2.2083E-8                 | SERPINA1 SERPINC1 ZGC:110377 A2ML KNG1 |
| endopeptidase regulator activity (GO:61135)                                     | 2.2083E-8                 | SERPINA1 SERPINC1 ZGC:110377 A2ML KNG1 |
| peptidase regulator activity (GO:61134)                                         | 2.2083E-8                 | SERPINA1 SERPINC1 ZGC:110377 A2ML KNG1 |
| peptidase inhibitor activity (GO:30414)                                         | 2.2083E-8                 | SERPINA1 SERPINC1 ZGC:110377 A2ML KNG1 |
| enzyme inhibitor activity (GO:4857)                                             | 5.2878E-8                 | SERPINA1 SERPINC1 ZGC:110377 A2ML KNG1 |
| enzyme regulator activity (GO:30234)                                            | 9.9472E-6                 | SERPINA1 SERPINC1 ZGC:110377 A2ML KNG1 |

|                                                          |           |                                   |
|----------------------------------------------------------|-----------|-----------------------------------|
| serine-type endopeptidase inhibitor activity (GO:4867)   | 2.2566E-5 | SERPINA1 SERPINC1 ZGC:110377      |
| protein binding, bridging (GO:30674)                     | 1.6737E-2 | FGA                               |
| ferric iron binding (GO:8199)                            | 3.2152E-2 | TFA                               |
| cysteine-type endopeptidase inhibitor activity (GO:4869) | 3.5576E-2 | KNG1                              |
| GO Cellular Component                                    |           |                                   |
| extracellular region (GO:5576)                           | 8.4350E-7 | ZGC:158446 FGA HPX APOEB A2ML TFA |
| extracellular space (GO:5615)                            | 4.7732E-3 | FGA A2ML                          |
| fibrinogen complex (GO:5577)                             | 5.1382E-3 | FGA                               |
| extracellular region part (GO:44421)                     | 1.0052E-2 | FGA A2ML                          |
